# Supplementary material for: Development of a novel necroptosis-associated miRNA risk signature to evaluate the prognosis of colon cancer patients
Source: PubMed Central journal article supplement — Ann Transl Med. 2021 Dec;9(24):1800. doi: 10.21037/atm-21-6576 (PMC8756225; doi:10.21037/atm-21-6576), 2021-12
Supplement: atm-09-24-1800-rc.pdf [file atm-09-24-1800-rc.pdf]

# RK checklist

| Reported                                                                                                                                                                                                                                                                                             | Reported on Page Number/Line Number                                 | Reported Section |
|------------------------------------------------------------------------------------------------------------------------------------------------------------------------------------------------------------------------------------------------------------------------------------------------------|---------------------------------------------------------------------|------------------|
| marker examined, the study objectives, and any pre-specified hypotheses.                                                                                                                                                                                                                             | Page 3, Line 75-79                                                  | Introduction     |
| <b>STUDY METHODS</b>                                                                                                                                                                                                                                                                                 |                                                                     |                  |
| the characteristics (e.g., disease stage or co-morbidities) of the study patients, including their source and inclusion and exclusion                                                                                                                                                                | Page 4, Line 82-87                                                  | Methods          |
| treatments received and how chosen (e.g., randomized or rule-based).                                                                                                                                                                                                                                 | -                                                                   | -                |
| Characteristics                                                                                                                                                                                                                                                                                      |                                                                     |                  |
| type of biological material used (including control samples) and methods of preservation and storage.                                                                                                                                                                                                | Page 5, Line 124-126                                                | Methods          |
| the assay method used and provide (or reference) a detailed protocol, including specific reagents or kits used, quality control measures, reproducibility assessments, quantitation methods, and scoring and reporting protocols. Specify whether and how assays were blinded to the study endpoint. | Page 5, Line 126-133                                                | Methods          |
| method of case selection, including whether prospective or retrospective and whether stratification or matching (e.g., by stage of disease or age) was used. Specify the time period from which cases were taken, the end of the follow-up period, and the median follow-up                          | Page 4, Line 82                                                     | Methods          |
| define all clinical endpoints examined.                                                                                                                                                                                                                                                              | -                                                                   | -                |
| candidate variables initially examined or considered for inclusion in models.                                                                                                                                                                                                                        | Page 4, Line 89-90<br>Table 1                                       | Methods          |
| rationale for sample size; if the study was designed to detect a specified effect size, give the target power and effect size.                                                                                                                                                                       | Page 4, Line 82                                                     | Methods          |
| Statistical methods                                                                                                                                                                                                                                                                                  |                                                                     |                  |
| all statistical methods, including details of any variable selection procedures and other model-building issues, how model assumptions were verified, and how missing data were handled.                                                                                                             | Page 4, Line 89-108<br>Page 5, Line 109-134<br>Page 6, Line 135-140 | Methods          |
| how marker values were handled in the analyses; if relevant, describe methods used for cutpoint determination.                                                                                                                                                                                       | -                                                                   | -                |

|                                                                                                                                                                                                                                                                                                                     |                                                                                                                     |                                                     |
|---------------------------------------------------------------------------------------------------------------------------------------------------------------------------------------------------------------------------------------------------------------------------------------------------------------------|---------------------------------------------------------------------------------------------------------------------|-----------------------------------------------------|
| the flow of patients through the study, including the number of patients included in each stage of the analysis (a diagram may be used) and reasons for dropout. Specifically, both overall and for each subgroup extensively examined report the numbers of patients and the number of events.                     | Page 6, Line145-146                                                                                                 | Results                                             |
| distributions of basic demographic characteristics (at least age and sex), standard (disease-specific) prognostic variables, and tumor marker, including numbers of missing values.                                                                                                                                 | Table 1                                                                                                             | -                                                   |
| presentation                                                                                                                                                                                                                                                                                                        |                                                                                                                     |                                                     |
| relation of the marker to standard prognostic variables.                                                                                                                                                                                                                                                            | Figure 2                                                                                                            | -                                                   |
| univariable analyses showing the relation between the marker and outcome, with the estimated effect (e.g., hazard ratio and probability). Preferably provide similar analyses for all other variables being analyzed. For the effect of a tumor marker on a continuous outcome, a Kaplan-Meier plot is recommended. | Figure 2; Figure 3                                                                                                  |                                                     |
| multivariable analyses, report estimated effects (e.g., hazard ratio) with confidence intervals for the marker and, at least for the model, all other variables in the model.                                                                                                                                       | Page 7, Line179-183                                                                                                 | Results                                             |
| reported results, provide estimated effects with confidence intervals from an analysis in which the marker and standard prognostic variables are included, regardless of their statistical significance.                                                                                                            | Table 3                                                                                                             |                                                     |
| report results of further investigations, such as checking assumptions, sensitivity analyses, and internal validation.                                                                                                                                                                                              | Page 7, Line172-174                                                                                                 | Results                                             |
| discuss the results in the context of the pre-specified hypotheses and other relevant studies; include a discussion of limitations of the study.                                                                                                                                                                    | Page 9, Line231-239<br>Page 10, Line246-248<br>Page 10, Line266-267<br>Page 11, Line268-269<br>Page 12, Line299-301 | Discuss<br>Discuss<br>Discuss<br>Discuss<br>Discuss |
| discuss implications for future research and clinical value.                                                                                                                                                                                                                                                        | Page 11, Line294-295<br>Page 12, Line 296, Line 303-306                                                             | Discuss<br>Conclus                                  |

Altman DG, Sauerbrei W, Taube SE, Gion M, Clark GM: Reporting recommendations for tumor marker prognostic studies (REMARK). J Natl Cancer Inst 2005;

DOI: <https://dx.doi.org/10.21037/atm-21-6576>

The page number/line number reported may be changed due to copyediting and may not be referable in the published version. A section/paragraph may be used as an alternative reference.
