# Supplementary material for: Development of a novel necroptosis-associated miRNA risk signature to evaluate the prognosis of colon cancer patients
Source: PubMed Central journal article supplement — Ann Transl Med. 2021 Dec;9(24):1800. doi: 10.21037/atm-21-6576 (PMC8756225; doi:10.21037/atm-21-6576), 2021-12
Supplement: atm-09-24-1800-supplementary.pdf [file atm-09-24-1800-supplementary.pdf]

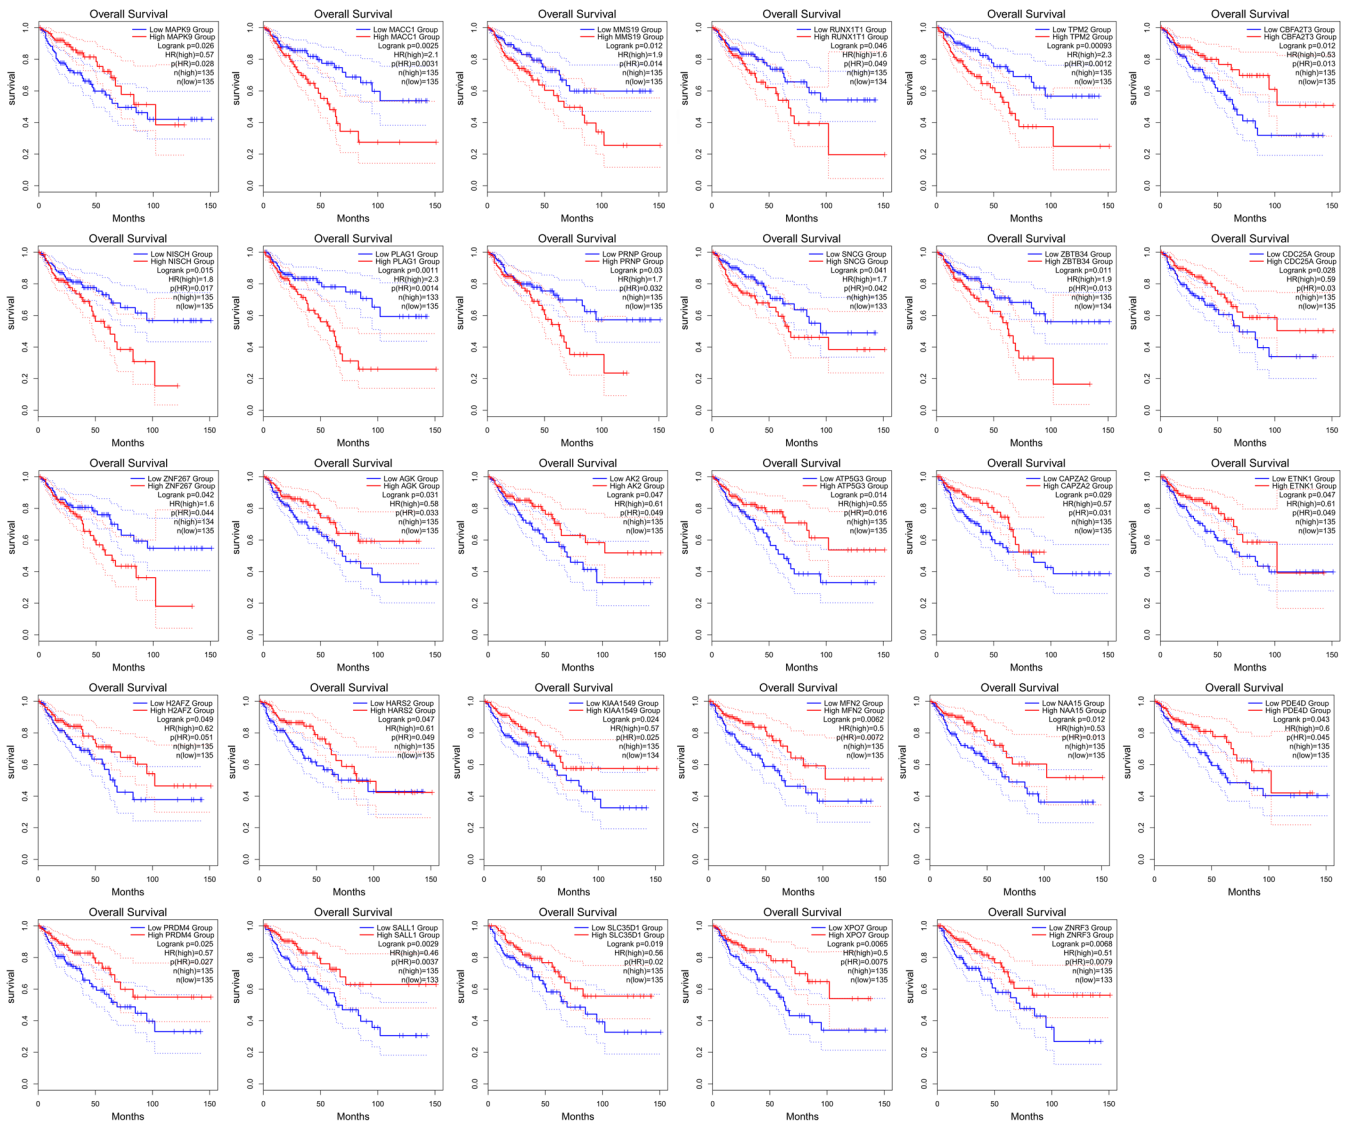

**Figure S1** Partial target gene analysis of OS in COAD patients. The relationship between OS and the expression of some target genes in COAD patients was analyzed. COAD, colon adenocarcinoma; OS, overall survival.

**Table S1** Sixteen miRNAs known to be associated with necroptosis

---

Necroptosis-associated miRNAs

---

miR-495

miR-331-3p

miR-15a

miR-148a-3p

miR-7-5p

miR-141-3p

miR-425-5p

miR-200a-5p

miR-210

miR-223-3p

miR-500a-3p

miR-181-5p

miR-16-5p

miR-371-5p

miR-373

miR-543

---

**Table S2** The primer sequences of necroptosis -related prognostic miRNAs

|         | has-miR-141-3p                | has-miR-148a-3p             | has-miR-16-5p          | has-miR-200a-5p                | has-miR-223-3p               | has-miR-425-5p                 | has-miR-7-5p                 | U6                         |
|---------|-------------------------------|-----------------------------|------------------------|--------------------------------|------------------------------|--------------------------------|------------------------------|----------------------------|
| forward | 5'- TCCCACCCAGTGCGATTGTC-3'   | 5'-TCAGTGCACTACAGAACTTTGT-3 | 5'-GCCCTTCGTCGTTAGA-3' | 5'-GGCTAACACTGTCTGGTAACGATG-3' | 5'-AGCTGGTGTGTGAATCAGGCCG-3' | 5'-TGCGGAATGACACGATCACTCCCG-3' | 5'-CCACGTTGGAAGACTAGTGATT-3' | 5'-CGCTTCGGCAGCACATATAC-3' |
| reverse | 5'- GTTGCTGGGAGGCTAAGATGAG-3' | 5'-GCTGTCAACGATACGCTACG-3'  | 5'-GTGCAGGGTCCGAGGT-3' | 5'-GTGCAGGGTCCGAGGT-3'         | 5'-TGGTGTCTGGAGTCG-3'        | 5'-CCAGTGCAGGGTCCGAGGT-3       | 5'-TATGGTTGTTCTGCTCTGTCTC-3' | 5'-CAGGGCCATGCTAATCTT-3'   |

**Table S3** Expression of 7 miRNAs with significant expression difference between colon cancer and normal tissues

| gene            | group1mea | group2mea | logFC    | p        | FDR      |
|-----------------|-----------|-----------|----------|----------|----------|
| hsa-miR-141-3p  | 4.802798  | 11.3477   | 1.240452 | 1.23E-06 | 3.25E-06 |
| hsa-miR-148a-3p | 12.21785  | 17.32932  | 0.504224 | 1.25E-06 | 3.25E-06 |
| hsa-miR-16-5p   | 5.155349  | 10.69774  | 1.053164 | 1.23E-06 | 3.25E-06 |
| hsa-miR-200a-5p | 10.0464   | 12.21582  | 0.282072 | 1.47E-05 | 2.21E-05 |
| hsa-miR-223-3p  | 5.636136  | 9.502325  | 0.753574 | 2.85E-06 | 5.12E-06 |
| hsa-miR-425-5p  | 7.601362  | 9.751484  | 0.359364 | 5.39E-05 | 6.93E-05 |
| hsa-miR-7-5p    | 0         | 4.848034  | Inf      | 1.44E-06 | 3.25E-06 |
